# Supplementary material for: The molecular design of photo-curable and high-strength benzoxazine for 3D printing
Source: Royal Society of Chemistry journal article supplement (doi:10.1039/d0cc07801h), 2021-01-01
Supplement: d0cc07801h1.pdf [file d0cc07801h1.pdf]

## Supporting Information

### Molecular Design Towards Photo-Curable and High-Strength Benzoxazine for 3D Printing

Yong Lu,<sup>1†</sup> Kok Wei Joseph Ng,<sup>2†</sup> Hui Chen,<sup>1†</sup> Xuelong Chen,<sup>2</sup> Song Kiat Jacob Lim,<sup>1</sup> Weili Yan,<sup>2</sup> Xiao Hu\*<sup>1,2,3</sup>

<sup>1</sup> Temasek Laboratories@NTU, Nanyang Technological University, Research Techno Plaza, 50 Nanyang Drive, 637553, Singapore.

<sup>2</sup> School of Materials Science and Engineering, Nanyang Technological University, 639798, Singapore.

<sup>3</sup> Nanyang Environment and Water Research Institute, Nanyang Technological University, Singapore 637141, Singapore

correspondence to: [asxhu@ntu.edu.sg](mailto:asxhu@ntu.edu.sg) (Xiao Hu)

## Experimental Part

**Materials.** Phenol (99%), 2,2-bis(4-hydroxyphenyl)propane (BPA) (99%), paraformaldehyde (95%), 2-aminoethanol (99%), 5-amino-1-pentanol (95%) and phenylbis(2,4,6-trimethylbenzoyl)phosphine oxide (BAPO) were purchased from Sigma-Aldrich. A commercial resin (GR20) was provided by BMF Material Technology Inc. (Shen Zhen). All other chemicals were reagent grade and used as received unless stated otherwise.

**Instrumentation.**  $^1\text{H}$  spectra were performed on a JOEL ECA400 nuclear magnetic resonance (NMR) spectrometer in  $\text{CDCl}_3$  and tetramethyl silane was used as internal standard. Fourier transform infrared (FT-IR) spectra were recorded by Perkin Elmer Frontier FTNIR/MIR spectrometers, with resolution of  $4\text{ cm}^{-1}$  for 16 scans. The UV-vis absorption was conducted on a UV-vis spectrometer (Shimadzu Model: UV2700) in dilute chloroform solution. Flow viscosity experiments were carried out using a TA instruments Discovery Series Hybrid Rheometer DHR-3 with a parallel plate (diameter 25 mm) attachment at  $25\text{ }^\circ\text{C}$  with a shear rate ranging from  $0.5$  to  $5\text{ s}^{-1}$ . Differential scanning calorimetry (DSC) (TA Instruments 2010) was performed from room temperature to  $300\text{ }^\circ\text{C}$  at a constant heating rate of  $10\text{ }^\circ\text{C}/\text{min}$  under nitrogen atmosphere. Thermogravimetric analysis (TGA) measurements were performed on a TA Instruments 2950 under nitrogen atmosphere at a heating rate of  $10\text{ }^\circ\text{C}/\text{min}$ . Dynamic mechanical analysis (DMA) was carried out with a TA instruments Q800 DMA utilizing the single cantilever mode with temperature ramp from room temperature to  $280\text{ }^\circ\text{C}$ . The flexural properties were measured by three-point bending tests with loading speed  $1\text{ mm}/\text{min}$  using a mechanical tester Instron 5567. The surface morphology of fractured samples was studied by field emission scanning electron microscope (FESEM) (JEOL JSM-7600F).

**General preparation of 3-(2-acrylicethyl)-3,4-dihydro-2H-1,3-benzoxazine (BZ-C2), 3-(5-acrylicpentyl)-3,4-dihydro-2H-1,3-benzoxazine (BZ-C5) and bis(3-phenyl-(3-(2-acrylicethyl)-3,4-dihydro-2H-1,3)-benzoxazinyl)isopropane (BZ-BA)**

**Preparation of hydroxyl-benzoxazine precursors.** Paraformaldehyde (2.0 eq) and amino alcohol (1.0 eq) were added to a round bottom flask with stirring for 1 h. Then, chloroform was added and followed by the addition of phenol (1.0 eq). The reaction mixture was heated up 70 °C to and reacted overnight. After cooling to room temperature, an extraction process was conducted with a sodium hydroxide solution (0.1 N). The extracted organic layer was dried over sodium sulphate, filtered and removed under vacuum to get the hydroxyl-benzoxazine. For the synthesis of BZ-BA precursor, BPA instead of phenol was used and the molar ratio of paraformaldehyde, 2-aminoethanol and BPA was 4:2:1.

**Preparation of BZ monomers.** To a solution of the acrylic acid (1.1 eq) in dry CH<sub>2</sub>Cl<sub>2</sub> at 0 °C, oxalyl chloride (COCl)<sub>2</sub> (1.1 eq) was added dropwise followed by adding a catalytic amount of dry DMF (2 drops). When the addition was complete, the solution was allowed to stir at room temperature for 3 h. The solvent was removed under reduce pressure to afford crude acryloyl chloride and directly used for next step. To an ice-bath cooled CH<sub>2</sub>Cl<sub>2</sub> solution with previously prepared hydroxyl-benzoxazine (1 eq.) and dried triethyl amine (1.1 eq.), the crude acryloyl chloride was added in slowly. The solution was brought to room temperature and continuously stirred at for another 4 h upon the complete addition. Then the CH<sub>2</sub>Cl<sub>2</sub> solution was washed with saturated NaHCO<sub>3</sub> solution for 3 times and DI water for 1 time. The CH<sub>2</sub>Cl<sub>2</sub> layer was collected, dried, filtered and CH<sub>2</sub>Cl<sub>2</sub> solvent was removed under vacuum to obtain the product. For the synthesis of BZ-BA, the molar ratio of acrylic acid, TEA and BZ-BA hydroxyl precursor was 2.2:2.2:1.

BZ-C2 (yellow liquid, yield: 82%): <sup>1</sup>H NMR (400 MHz, CDCl<sub>3</sub>): δ (ppm) 7.13 - 6.77 (m, 4H, aromatics), 6.42 (dd, 1H), 6.14 (q, 1H), 5.85 (dd, 1H), 4.85 (s, 2H), 4.32 (t, 2H), 4.05 (s, 2H), 3.07 (t, 2H). FTIR (KBr, cm<sup>-1</sup>): 1720 (C=O st), 1638 (C=C st), 1490 (C-C Ar st), 1224 (C-O-C st asymmetric), 1063 (C-O-C st symmetric), 933 (N-C-O st).

BZ-C5 (yellow liquid, yield: 86%):  $^1\text{H}$  NMR (400 MHz,  $\text{CDCl}_3$ ):  $\delta$  (ppm) 7.09 - 6.75 (m, 4H, aromatics), 6.38 (dd, 1H), 6.10 (q, 1H), 5.79 (dd, 1H), 4.83 (s, 2H), 4.14 (t, 2H), 3.96 (s, 2H), 2.73 (t, 2H), 1.71-1.41 (m, 6H). FTIR (KBr,  $\text{cm}^{-1}$ ): 1723 (C=O st), 1635 (C=C st), 1487 (C-C Ar st), 1226 (C-O-C st asymmetric), 1059 (C-O-C st symmetric), 928 (N-C-O st).

BZ-BA (highly viscous orange liquid, yield: 78%):  $^1\text{H}$  NMR (400 MHz,  $\text{CDCl}_3$ ):  $\delta$  (ppm) 7.27 - 6.93 (m, 6H, aromatics), 6.56 (dd, 2H), 6.25 (q, 2H), 6.02 (dd, 2H), 4.88 (s, 4H), 4.37 (t, 4H), 4.10 (s, 4H), 3.11 (t, 4H), 1.57 (s, 6H).

### **Resin formulation based on BZ-C2 and BZ-C5 monomers.**

*Resin formulation based on BZ-C2 monomer:* BZ-C2, BAPO (0.45 wt%) and THF (30 wt%) were mixed together and homogenized with a vortex mixer for 30 s. The resultant mixture was subsequently allowed to stand at room temperature for 2 h to ensure the absence of bubbles.

*Resin formulation based on BZ-C5 monomer:* BAPO (0.6 wt%) was dissolved in a miniscule amount of THF and then added to BZ-C5. The mixture was mixed homogeneously using a vortex mixer for 30 s and stand for 2h to ensure the absence of bubbles.

**Sample preparation by photo and thermal cure.** Samples for FT-IR, DSC, TGA, DMA and 3-point bending test were prepared by UV photocuring uniform samples firstly, followed by thermal curing with a progressive heat treatment. Typically, liquid BZ-C2 or BZ-C5 and photo initiator BAPO were mixed vigorously. The resin was added into silicone moulds with round or rectangular cavity and photocured within a UV chamber ( $2 \text{ mW/cm}^2$ ) for 3 min. The specimens were demoulded, flipped over and photocured within the UV chamber for another 3 min. The specimen thickness was controlled by the resin adding volume. The thermal curing was subsequently carried out by subjecting the photocured samples to the following heating schedule: 140 °C (1 h), 160 °C (1 h), 180 °C (1 h), 200 °C (1h), 220 °C (1 h) and 240 °C (1 h).

**P $\mu$ SL printing with BZ-C2 or BZ-C5 based resin formulation.** The P $\mu$ SL printing process was performed with a commercially available 3D printer (nanoArch S140, BMF). A UV-LED (405 nm) was utilized as the light resource. The intensity of 17.5 mW cm<sup>-2</sup> was used during all printing. Computer aided design (CAD) of the print structures were designed in the software of Autodesk fusion 360. The resulting STL files were sliced for a 2D file output using BMF P $\mu$ SL printing software with different slicing thickness. After printing, the acquired objects were washed thoroughly with isopropanol to remove any residual unreacted resin, left to dry for 5 min and then placed into a UV curing chamber for further photopolymerization for 5 min. The printed 3D structures were placed into a vacuum oven at 60 °C overnight to remove residual solvent.

**Preparation of PBZ 3D structured objects.** The fully dried 3D structured objects were then undergone thermal treatment as described above to achieve the final PBZ products. The heights of the 3D structured objects were measured using a micrometre for 3 times before and after the thermal treatment.

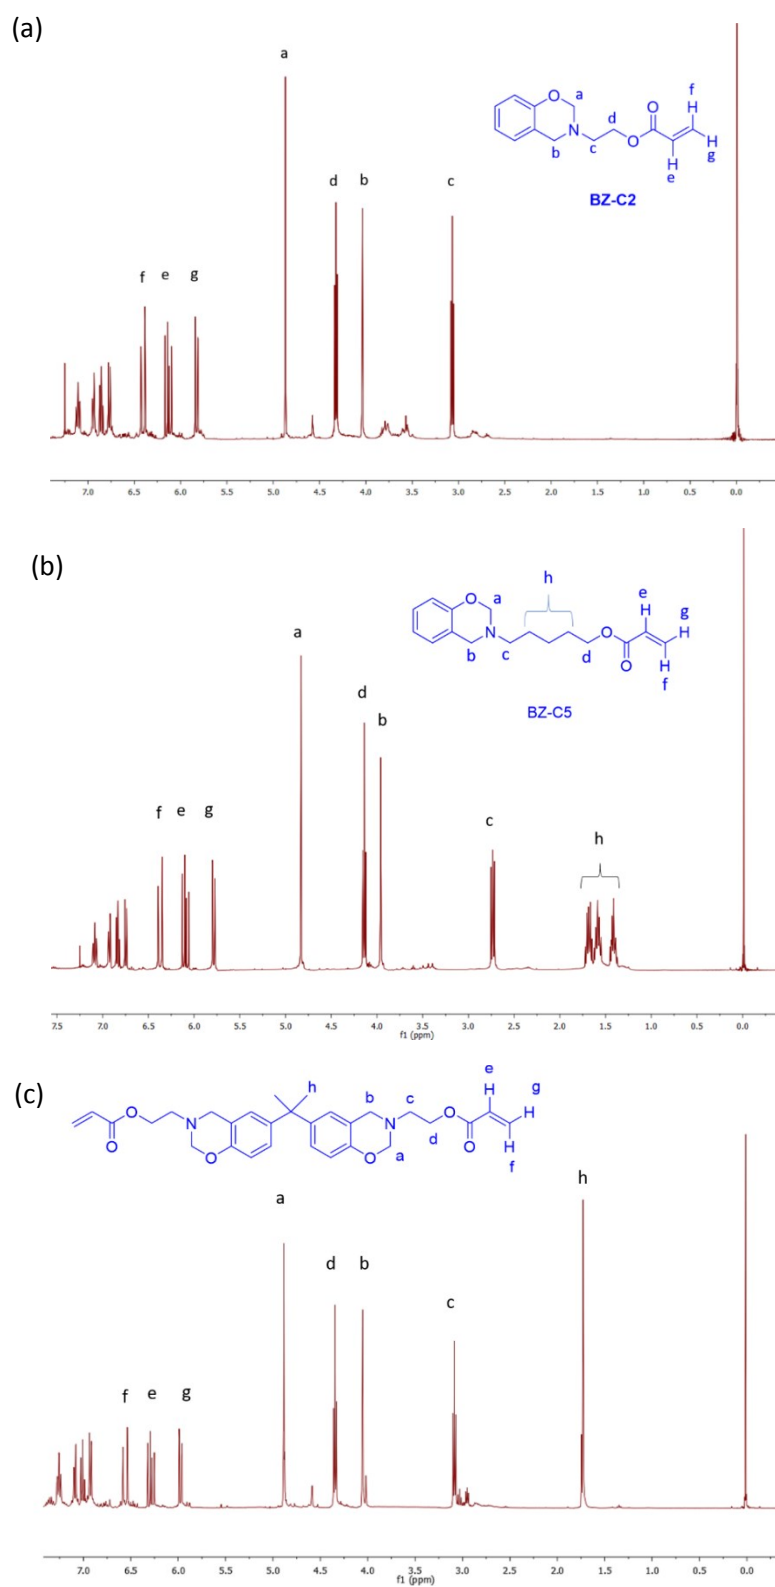

**Fig. S1**  $^1\text{H}$  NMR spectra of (a) BZ-C2, (b) BZ-C5 and (c) BZ-BA compounds.

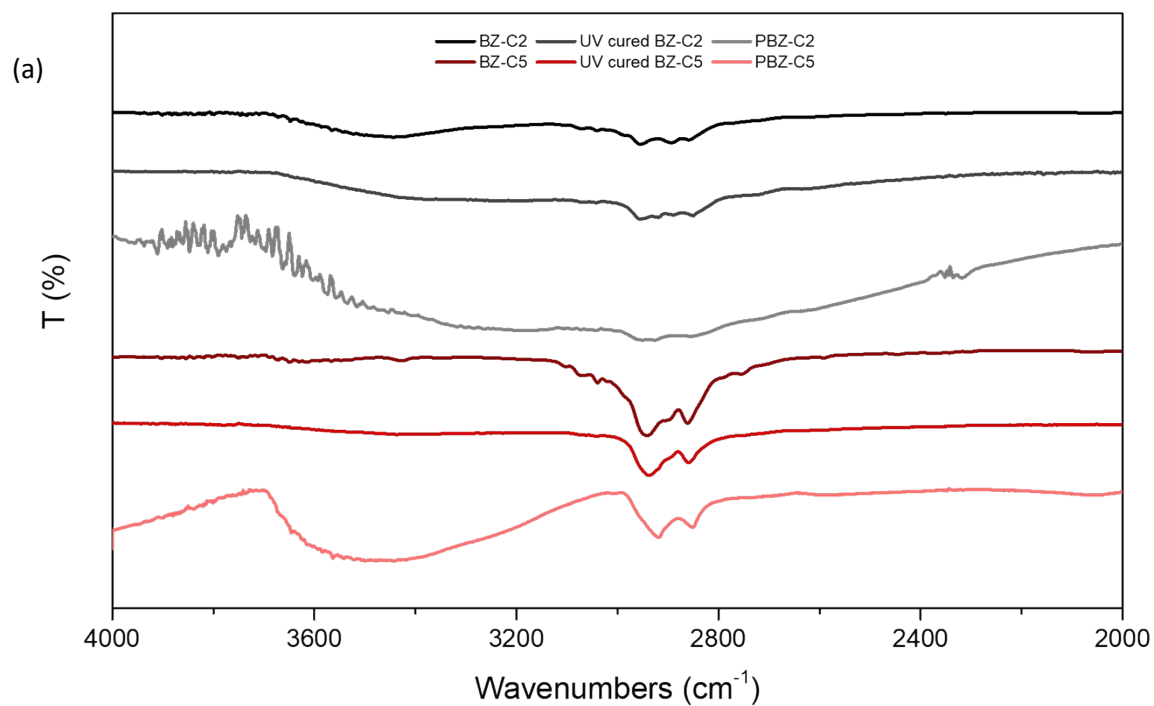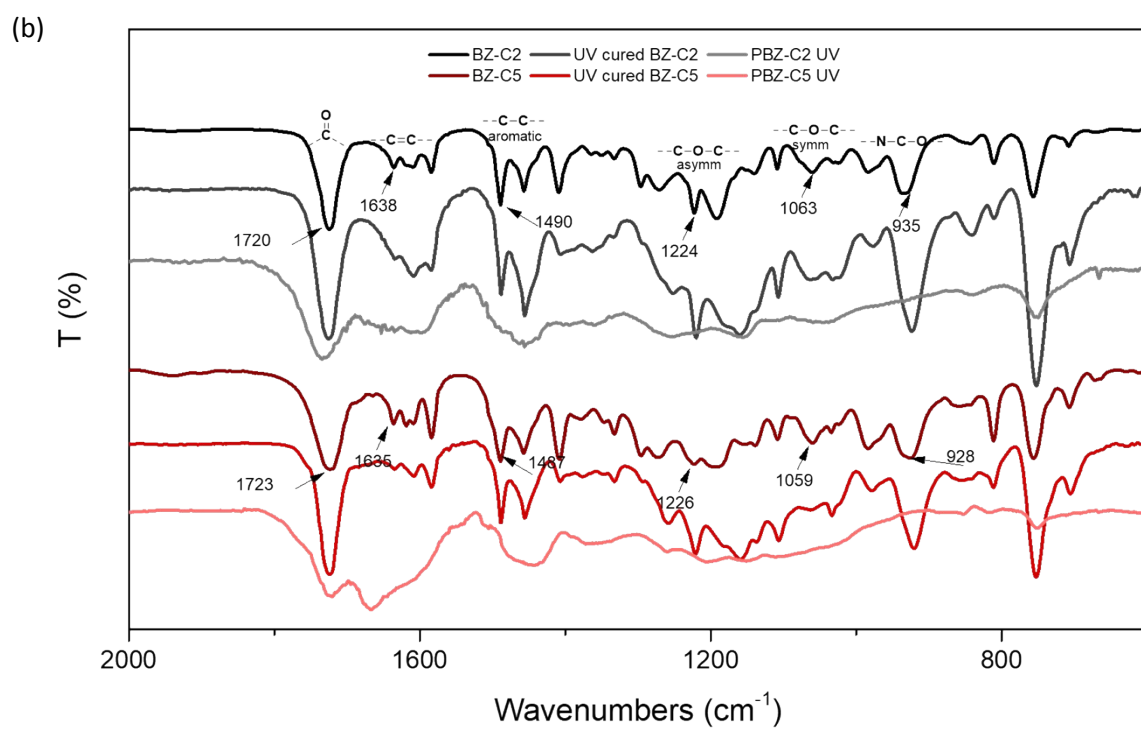

**Fig. S2** FT-IR spectra of monomers, photo cured BZ-C2/C5 and PBZ-C2/C5.

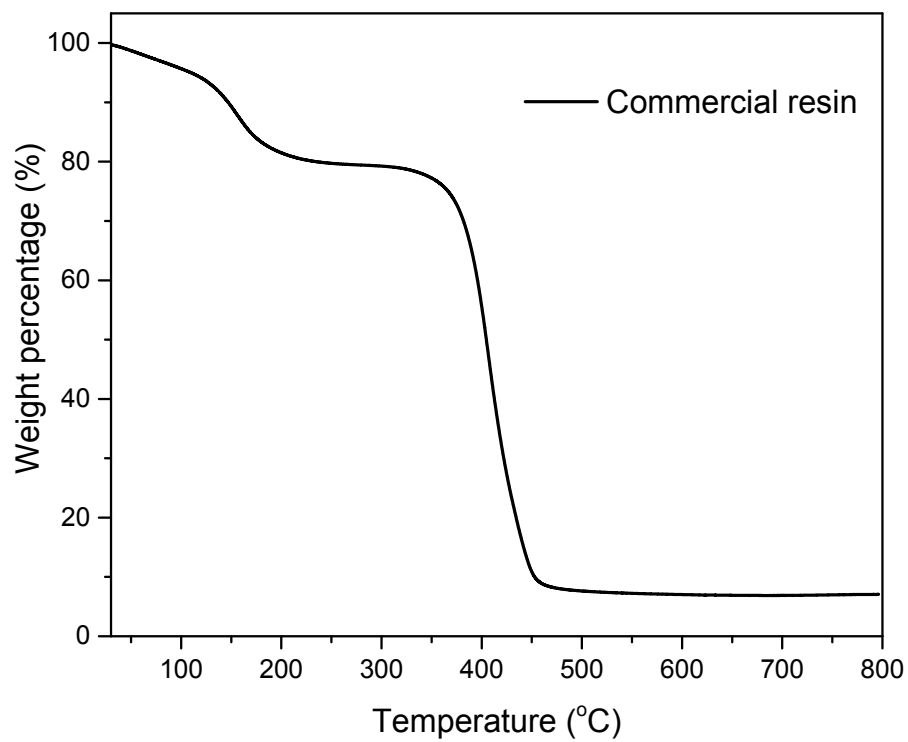

**Fig. S3** TGA curve of a commercial resin (GR20) in  $N_2$  atmosphere.

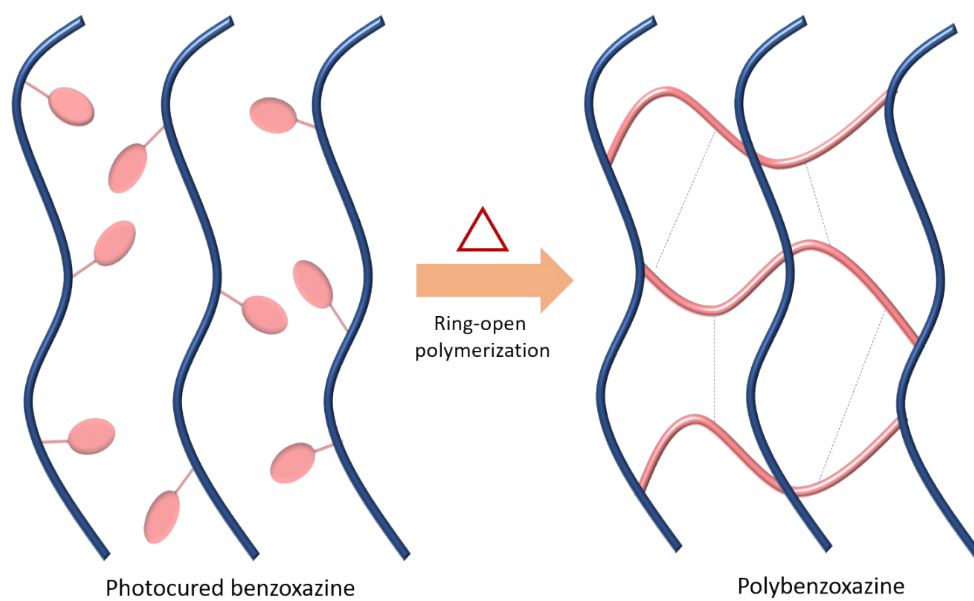

**Fig. S4** Schematic illustration of the triple networks formed in the PBZs.



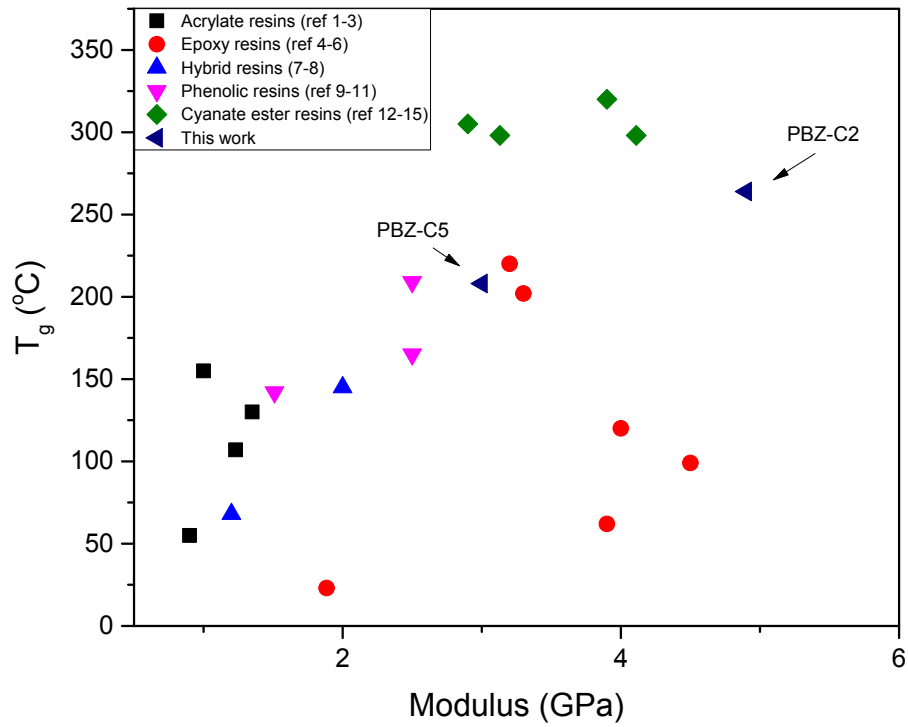

**Fig. S5** T<sub>g</sub> and modulus of PBZ-C2 and PBZ-C5 compared with literature results.

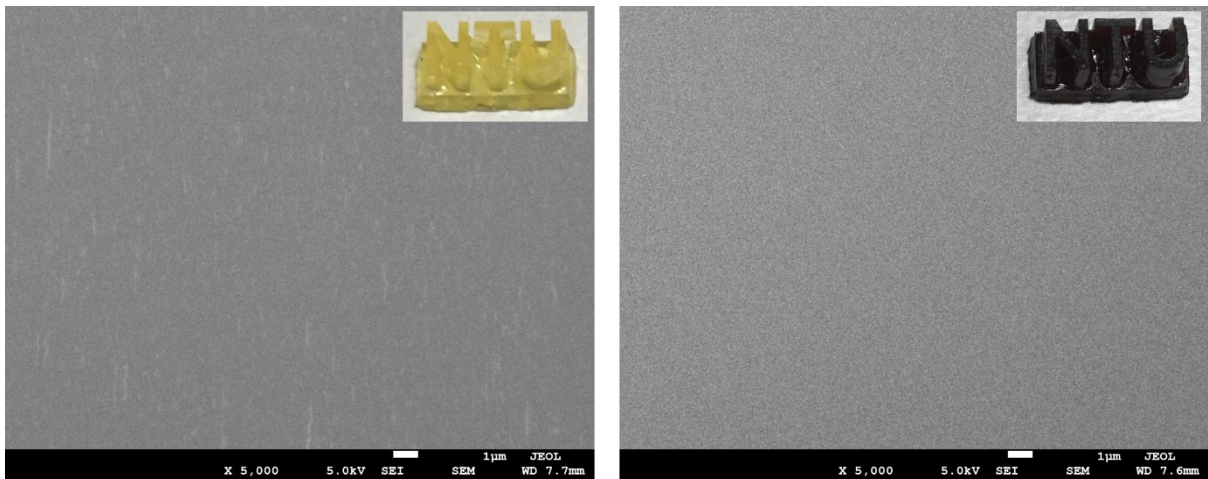

**Fig. S6** SEM images of fracture surface of printed NTU logo before (left) and after thermal treatment (right). (BZ-C2 based resin, insets: photos of as-printed NTU logo before and after thermal curing).

**Table S1** Mechanical performances determined by 3-point bending test

| BZ resins | Thermally cured temperature (°C) | Modulus (GPa) | Flexure stress (MPa)* | Flexure strain (%)* |
|-----------|----------------------------------|---------------|-----------------------|---------------------|
| BZ-C2     | 180                              | 3.90 ± 0.22   | 98.4 ± 10.0           | 2.5 ± 0.2           |
|           | 240                              | 4.91 ± 0.21   | 154.3 ± 15.7          | 3.2 ± 0.2           |
| BZ-C5     | 180                              | 2.32 ± 0.15   | 94.0 ± 7.8            | 3.7 ± 0.2           |
|           | 240                              | 3.00 ± 0.21   | 133.4 ± 10.6          | 4.4 ± 0.3           |

\* Average flexure stress and strain at yield point

#### References:

- (1) B. Zhang, K. Kowsari, A. Serjouei, M. L. Dunn and Q. Ge, *Nat. Commun.*, 2018, **9**, 1831.
- (2) S. Deng, J. Wu, M. D. Dickey, Q. Zhao and Tao Xie, *Adv. Mater.*, 2019, 31, 1903970.
- (3) R. Ding, Y. Du, R. B. Goncalves, L. F. Francis and T. M. Reineke, *Polym. Chem.*, 2019, **10**, 1067-1077.
- (4) A. Trogé, R.L. O’Leary, G. Hayward, R. A. Pethrick and A. J. Mullholland, *J. Acoust. Soc. Am.*, 2010, **128**, 2704-2714.
- (5) Q. Nguyen, N. Nguyen, A. R. de Anda, V. Nguyen, D. Versace, V. Langlois and S. N. E. Renard, *J. Appl. Polym. Sci.*, 2020, **137**, e49051.
- (6) R. Feng and R. J. Farris, *J. Mater. Sci.*, 2002, **37**, 4793-4799.
- (7) X. Kuang, J. Wu, K. Chen, Z. Zhao, Z. Ding, F. Hu, D. Fang and H. J. Qi, *Sci. Adv.*, 2019, **5**, eaav5790.
- (8) X. Kuang, Z. Zhao, K. Chen, D. Fang, G. Kang and H. J. Qi, *Macromol. Rapid Commun.*, 2018, **39**, 1700809.
- (9) P. Jahanmard and A. Shojaei, *RSC Adv.*, 2015, **5**, 80875-80883.
- (10) J. Zhou, Z. Yao, Y. Chen, D. Wei, Y. Wu and T. Xu, *Poly. Compos.*, 2013, **34**, 1245-1249.
- (11) F. Cardona, A. L. Kin-Tak and J. Fedrigo, *J. Appl. Poly. Sci.*, 2012, **123**, 2131-2139.

- (12) S. Gangulia, D. Deana, K. Jordanb, G. Pricec and R. Vaia, *Polymer*, 2003, **44**, 1315-1319.
- (13) I. Mondragón, L. Solar, A. Nohales, C. I. Vallo and C. M. Gómez, *Polymer*, 2006, **47**, 3401-3409.
- (14) X. Gu, Z. Zhang, L. Yuan, G. Liang and A. Gu, *Chem. Eng. J.*, 2016, **298**, 214-224.
- (15) H. Li, J. Gu, C. Liu, D. Wang and C. Qu, *High Perform. Polym.*, 2018, **30**, 38-46.
